# Supplementary material
Source: PubMed Central journal article supplement (PMC6379083)
Supplement: NIHMS1010911-supplement-Supporting_Information.pdf [file NIHMS1010911-supplement-Supporting_Information.pdf]

## Supporting Information

# HOTMAQ: a multiplexed absolute quantification method for targeted proteomics

Xiaofang Zhong<sup>1</sup>, Qinying Yu<sup>1</sup>, Fengfei Ma<sup>1</sup>, Dustin C. Frost<sup>1</sup>, Lei Lu<sup>1</sup>, Zhengwei Chen<sup>2</sup>, Henrik Zetterberg<sup>3,4,5,6</sup>, Cynthia Carlsson<sup>7</sup>, Ozioma Okonkwo<sup>7</sup>, Lingjun Li<sup>1,2,\*</sup>

<sup>1</sup>School of Pharmacy, University of Wisconsin-Madison, Madison, Wisconsin 53705, USA.

<sup>2</sup>Department of Chemistry, University of Wisconsin-Madison, Madison, Wisconsin 53706, USA.

<sup>3</sup>Institute of Neuroscience and Physiology, Sahlgrenska Academy, University of Gothenburg, S-431 80, Gothenburg, Sweden.

<sup>4</sup>Clinical Neurochemistry Laboratory, Sahlgrenska University Hospital, S-431 80 Mölndal, Sweden.

<sup>5</sup>Department of Molecular Neuroscience, UCL Institute of Neurology, Queen Square, London, WC1N 3BG, UK.

<sup>6</sup>UK Dementia Research Institute at UCL, London, WC1N 3BG, UK

<sup>7</sup>School of Medicine and Public Health, University of Wisconsin, Madison, Wisconsin 53705, USA.

**\*Corresponding author**

E-mail: lingjun.li@wisc.edu

## **Supporting Information Table of Contents**

**Supplementary Figure S1.** Structures of *N,N*-dimethyl leucine (DiLeu) tags.

**Supplementary Figure S2.** Ratio optimization for trigger peptides and target peptides.

**Supplementary Figure S3.** Comparison of ApoE regarding to gender difference and *APOE*  $\epsilon$ 4 genotype in preclinical Alzheimer's disease.

**Supplementary Table S1.** Primary and isotopic peak fractions for DiLeu reporter ions.

**Supplementary Table S2.** Primary and isotopic peak fractions for iDiLeu-labeled target peptides.

**Supplementary Table S3.** Characteristics of study participants.

## Supplementary Figures and Tables

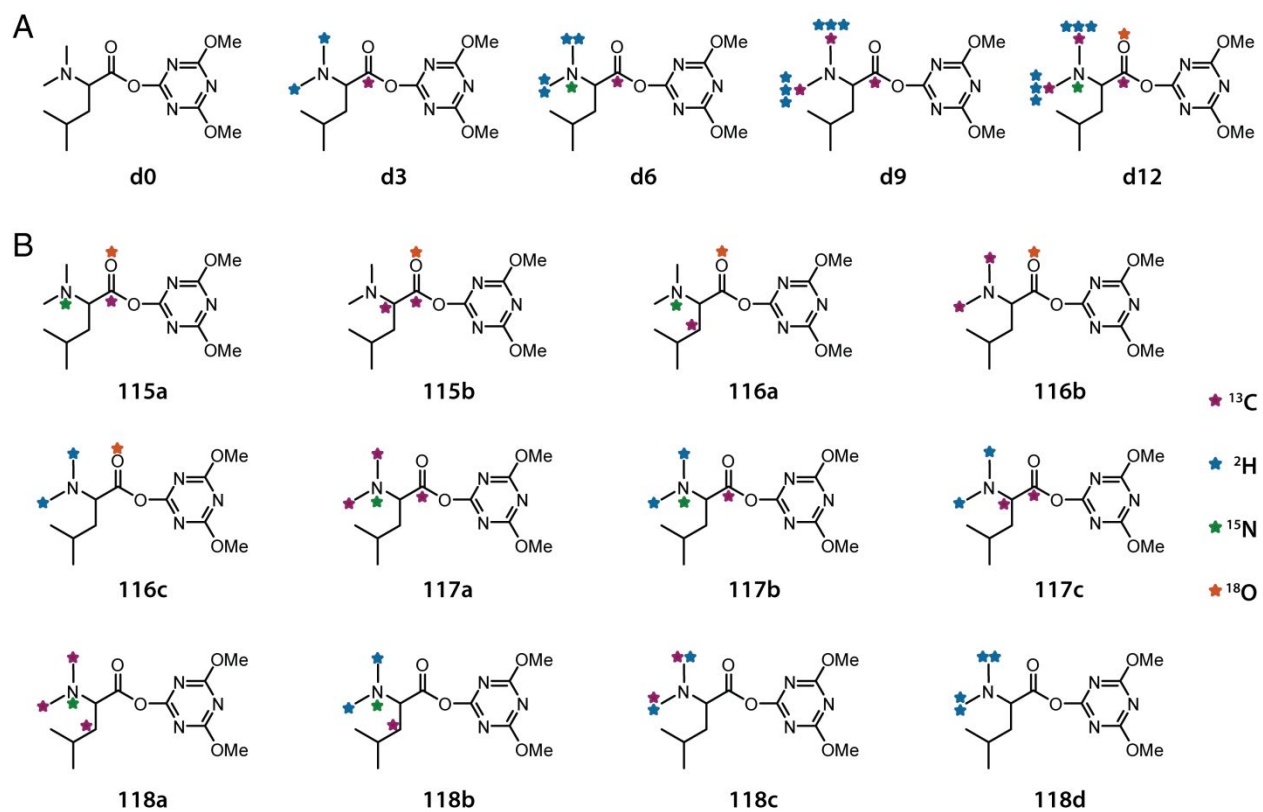

**Figure S1.** Structures of *N,N*-dimethyl leucine (DiLeu) tags. Stable isotope positions are shown in the structures of the 5-plex mass difference iDiLeu tags (A) and 12-plex isobaric DiLeu tags (B).

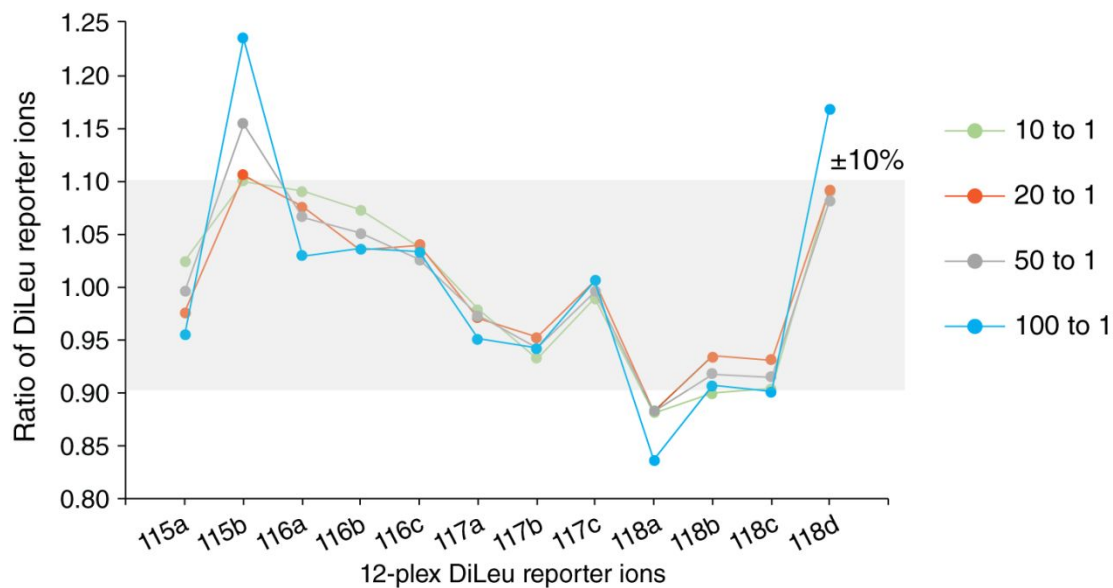

**Figure S2.** Ratio optimization for trigger peptides and target peptides. 12-plex DiLeu-labeled peptide standards were combined at 1:1 ratios across all channels. d0-labeled synthetic peptides were spiked in at a ratio of 10:1, 20:1, 50:1, and 100:1, respectively. The light grey shaded region represents relative error within  $\pm 10\%$ .

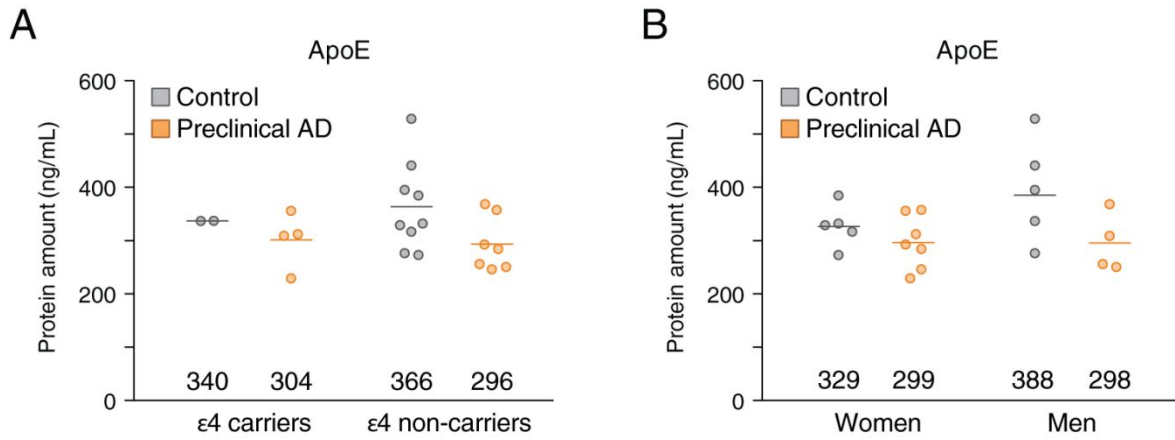

**Figure S3.** Comparison of ApoE regarding to gender difference and APOE  $\epsilon$ 4 genotype in preclinical Alzheimer's disease. ApoE amount for healthy (grey) and preclinical (orange) subjects were measured in *APOE*  $\epsilon$ 4 carriers and non-carriers (A), as well as women and men (B). The demarcated line on the plots for (A) and (B) shows the average amount of ApoE.

**Table S1. Primary and isotopic peak fractions for DiLeu reporter ions**

| DiLeu tag             | 114   | 115a  | 115b  | 116a  | 116b  | 116c  | 117a  | 117b  | 117c  | 118a  | 118b  | 118c  | 118d  |
|-----------------------|-------|-------|-------|-------|-------|-------|-------|-------|-------|-------|-------|-------|-------|
| -1 ( <sup>1</sup> H)  |       |       |       |       |       | 0.032 |       | 0.039 | 0.031 |       | 0.026 | 0.023 | 0.003 |
| -1 ( <sup>12</sup> C) |       |       | 0.004 | 0.009 | 0.013 |       | 0.113 |       | 0.003 | 0.019 | 0.008 | 0.009 |       |
| -1 ( <sup>14</sup> N) |       | 0.006 |       | 0.007 |       |       | 0.007 | 0.004 |       | 0.007 | 0.007 |       |       |
| 0                     | 0.951 | 0.942 | 0.94  | 0.948 | 0.949 | 0.916 | 0.847 | 0.905 | 0.937 | 0.942 | 0.918 | 0.930 | 0.959 |
| +1 ( <sup>13</sup> C) | 0.049 | 0.052 | 0.054 | 0.036 | 0.039 | 0.051 | 0.033 | 0.052 | 0.029 | 0.032 | 0.042 | 0.038 | 0.038 |

The total reporter ion intensity for each channel is composite of primary reporter ion (0) and isotopic peaks ( $\pm 1$ ). Only peaks within greater than 0.1% of the total signal was accounted.

**Table S2. Primary and isotopic peak fractions for iDiLeu-labeled target peptides**

| Uniprot ID | Protein | Peptide        | xd0    | yd0    | xd12p  | yd12p  | xd6    | yd6    | xd9    | yd9    | xd12   | zd12   |
|------------|---------|----------------|--------|--------|--------|--------|--------|--------|--------|--------|--------|--------|
| P61981     | 14-3-3  | NVTELNEPLSNEER | 0.3825 | 0.0206 | 0.3740 | 0.1635 | 0.3948 | 0.0634 | 0.3923 | 0.0589 | 0.3725 | 0.0047 |
| O15240     | VGF     | THLGEALAPLSK   | 0.4234 | 0.0000 | 0.4194 | 0.0088 | 0.4360 | 0.0006 | 0.4235 | 0.0004 | 0.3741 | 0.0015 |
| P02766     | TTR     | GSPAINVAVHVFR  | 0.4225 | 0.0139 | 0.4069 | 0.1449 | 0.4267 | 0.0507 | 0.4302 | 0.0431 | 0.3980 | 0.0059 |
| P02649     | ApoE    | AATVGSLAQPLQER | 0.4065 | 0.0164 | 0.4055 | 0.1420 | 0.4136 | 0.0559 | 0.4095 | 0.0523 | 0.3863 | 0.0041 |
| P02649     | ApoE    | QWAGLVEK       | 0.4832 | 0.0000 | 0.4602 | 0.0084 | 0.5018 | 0.0002 | 0.4809 | 0.0001 | 0.4128 | 0.0020 |
| P02649     | ApoE    | LGPLVEQGR      | 0.5360 | 0.0055 | 0.5294 | 0.0926 | 0.5429 | 0.0257 | 0.5234 | 0.0226 | 0.4939 | 0.0055 |

x, y, and z represent the percentages of monoisotopic peak, interference peak to the heavier mass-labeled peptide, and interference peak to the lighter mass-labeled peptide, respectively.

**Table S3. Characteristics of study participants**

| Diagnosis              | Age (years)    | Education (years) | MMSE Score     | Family history of dementia % | Gender % (W/M) | ApoE $\epsilon$ 4 carriers (n) |
|------------------------|----------------|-------------------|----------------|------------------------------|----------------|--------------------------------|
| Control<br>n=11        | 59.8 $\pm$ 6.6 | 15.5 $\pm$ 2.3    | 29.4 $\pm$ 1.0 | 73                           | 45/55          | 2                              |
| Preclinical AD<br>n=11 | 59.4 $\pm$ 4.6 | 16.3 $\pm$ 2.1    | 29.3 $\pm$ 0.7 | 82                           | 64/36          | 4                              |

Data are presented as mean  $\pm$  standard deviation

AD, Alzheimer's disease

W, Women; M, Men

MMSE: Mini-mental state examination
